# Supplementary material for: Low saliva pH can yield false positives results in simple RT-LAMP-based SARS-CoV-2 diagnostic tests
Source: PubMed Central journal article supplement (PMC8099103; doi:10.1371/journal.pone.0250202), 2021-05-05

SUPPLEMENTARY FIGURES

Copies/reaction

(2) T=30

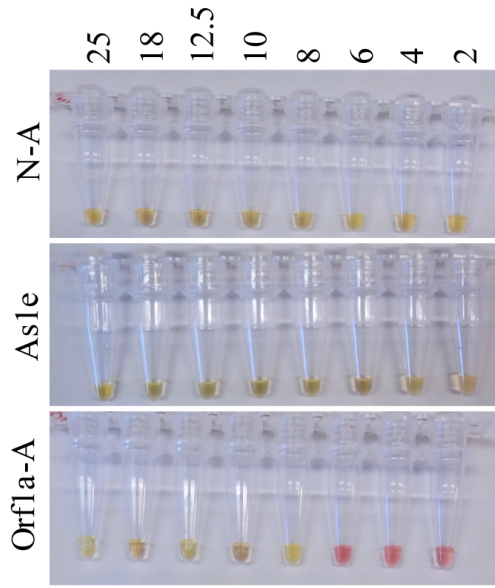

(3) T= 30

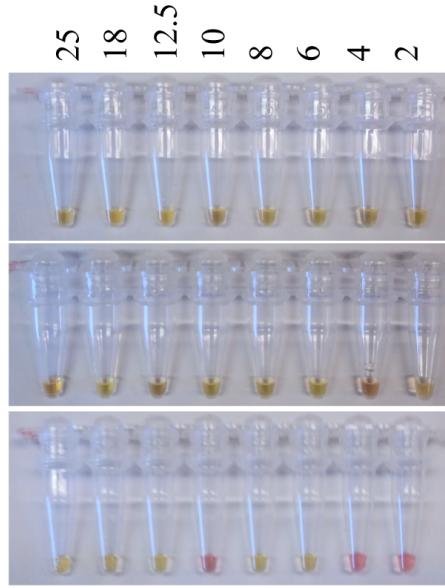

Controls

N-A AsIe orfla-A

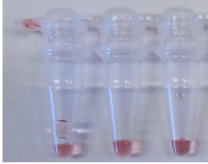

N-A AsIe orfla-A

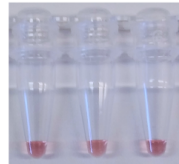

Supplement: pone.0250202.s001.pdf [file pone.0250202.s001.pdf]
