# Supplementary material for: Low saliva pH can yield false positives results in simple RT-LAMP-based SARS-CoV-2 diagnostic tests
Source: PubMed Central journal article supplement (PMC8099103; doi:10.1371/journal.pone.0250202), 2021-05-05

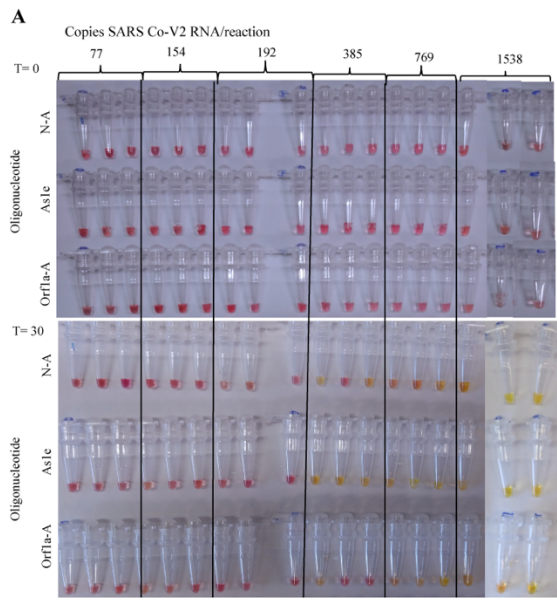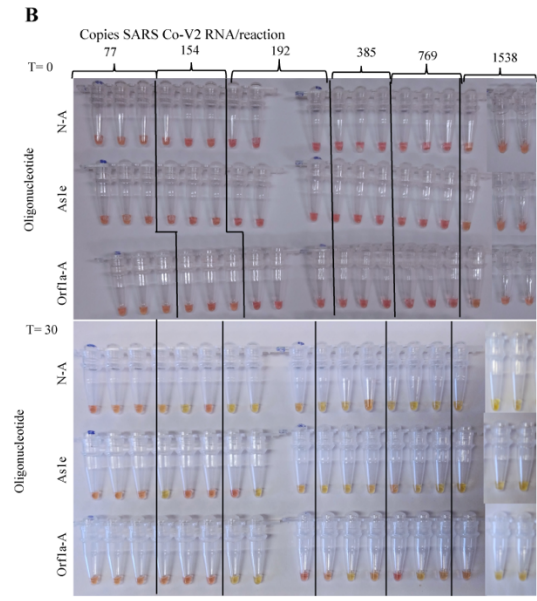

Supplement: pone.0250202.s002.pdf [file pone.0250202.s002.pdf]
